# Supplementary material for: One-step fabrication of a transparent and conductive TiOx/Ag nanowire hybrid thin film with high robustness
Source: Royal Society of Chemistry journal article supplement (doi:10.1039/c5ra27812k), 2016-01-01
Supplement: c5ra27812k1.pdf [file c5ra27812k1.pdf]

## Electronic Supplementary Information

# One-Step Fabrication of Transparent and Conductive TiO<sub>x</sub>/Ag Nanowire Hybrid Thin Film with High Robustness†

Shenjie Li,<sup>a,b</sup> Yanyan Chen,<sup>a,b</sup> Lijian Huang<sup>a\*</sup> and Daocheng Pan<sup>a\*</sup>

<sup>a</sup>*State Key Laboratory of Rare Earth Resource Utilization, Changchun Institute of Applied Chemistry, Chinese Academy of Sciences, Changchun, Jilin, 130022, China*

<sup>b</sup>*Department of Chemical Engineering and Food Processing, HeFei University of Technology, 301 Xunhua Road, Xuancheng, Anhui, 24200, China*

Email: pan@ciac.ac.cn; Tel: 86-431-85622974

## Experimental Details

### I. Chemicals

Ag NW/ethanol dispersion (10 mg/mL, ~50.3 nm×15.7 μm) was bought from Blue Nano Inc. Titanium isopropoxide (98%), ethanolamine (AR) and 2-methoxyethanol (AR) were purchased from Aladdin Inc.

### II. Preparation of TiO<sub>x</sub>/Ag NW dispersion

TiO<sub>x</sub> sol-gel solution was firstly prepared according to a modified procedure.<sup>1</sup> 2.0 mL of titanium isopropoxide and 1.0 mL of ethanolamine were added into 10.0 mL of 2-methoxyethanol under magnetic stirring. Then, the mixed solution was putted on a hotplate at 100 °C for 2 h. Finally, an orange-red TiO<sub>x</sub> sol-gel solution was obtained. 1.0 mL of TiO<sub>x</sub> sol-gel solution (~40 mg TiO<sub>x</sub>) and 1.0 mL of Ag NW/ethanol

dispersion (~10 mg AgNWs) were mixed under magnetic stirring, forming TiO<sub>x</sub>/Ag NW dispersion.

### Deposition of TiO<sub>x</sub>/Ag NW hybrid thin film

TiO<sub>x</sub>/Ag NW hybrid thin film was fabricated by a spin-casting process at 2500 rpm for 15 s, followed by a sintering process on a pre-heated hotplate at 180-280 °C for 2 min. A multi-step spin-casting method was utilized to achieve TiO<sub>x</sub>/Ag NW hybrid thin films with different AgNW densities.

### III. Characterizations

The scanning electron microscope (SEM) images were taken using a Hitachi S-4800. UV-vis transmittance spectra were measured by Metash UV-5200. The sheet resistance was measured using a 4-point probe method with a Keithley 2400 source meter (Sheet resistance=measured resistance×4.532). The film thickness and surface roughness were measured by a step profilermeter (AMBIOS, XP-100).

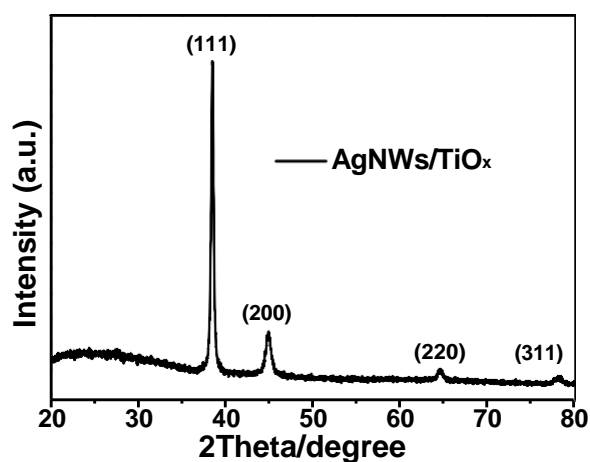

**Figure S1** XRD pattern of TiO<sub>x</sub>/Ag NW hybrid network

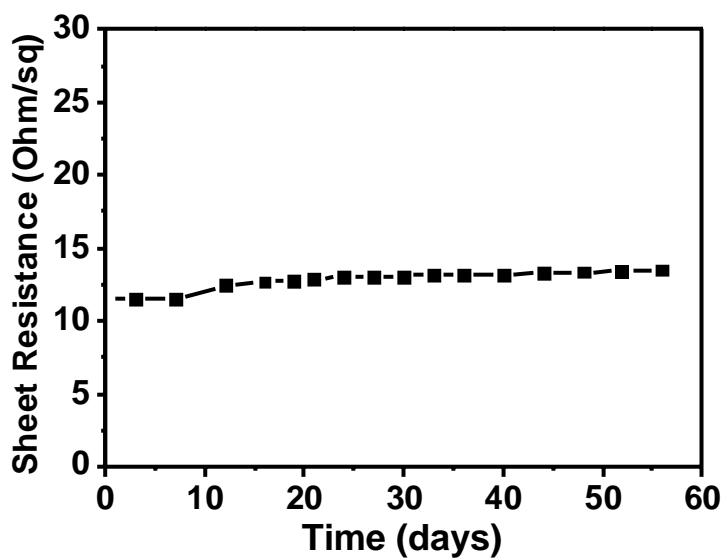

**Figure S2.** The stability of sheet resistance of transparent and conductive  $\text{TiO}_x/\text{Ag}$  NW hybrid thin film.

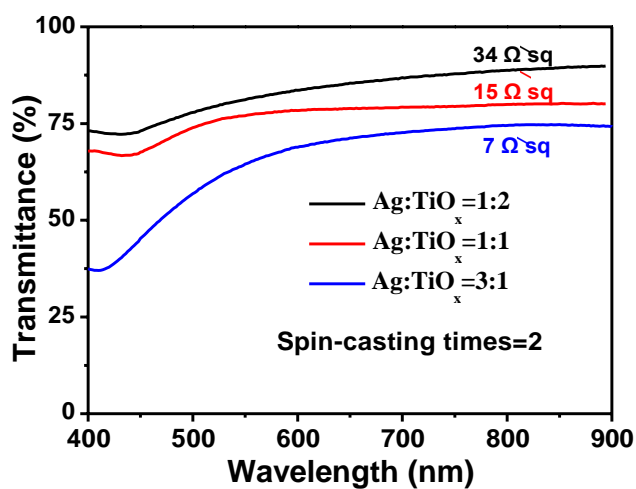

**Figure S3** The transmittance spectra and sheet resistance of  $\text{TiO}_x/\text{Ag}$  NW hybrid thin films with different  $\text{Ag}/\text{TiO}_x$  volume ratios.

### Reference

1. J. Y. Kim, K. Lee, N. E. Coates, D. Moses, T. Q. Nguyen, M. Dante and A. Heeger, *Science*, 2007, **317**, 222-225.
